# Supplementary material for: Four new species of Hexanchorus Sharp from Ecuador (Coleoptera, Elmidae) with DNA barcoding and notes on the distribution of the genus
Source: Zookeys. 2019 Apr 11;838:85–109. doi: 10.3897/zookeys.838.33086 (PMC6477852; doi:10.3897/zookeys.838.33086)
Supplement: Supplementary material 1 [file zookeys-838-085-s001.xls]

## Sheet: MatrixOutput
Table S1 (supplementary). Pairwise genetic distance among specimens (Kimura 2-parameter distance) using 625bp fragment of COI gene.
	Hexanchorus cordillierae FZ602	Hexanchorus cordillierae FZ956	Hexanchorus cordillierae FZ966	Hexanchorus cordillierae FZ987	Hexanchorus cordillierae FZ972	Hexanchorus cordillierae FZ1242	Hexanchorus cordillierae FZ1243	Hexanchorus cordillierae FZ1244	Hexanchorus cordillierae FZ1245	Hexanchorus cordillierae FZ1248	Hexanchorus onorei onorei FZ621	Hexanchorus onorei onorei FZ971	Hexanchorus onorei onorei FZ1246	Hexanchorus onorei onorei FZ969	Hexanchorus onorei sagittatus FZ773	Hexanchorus onorei sagittatus FZ970	Hexanchorus onorei sagittatus FZ1252	Hexanchorus shepardi FZ967	Hexanchorus shepardi FZ968	Hexanchorus shepardi FZ1247	Hexanchorus tarsalis FZ1249	Hexanchorus tarsalis FZ1253	Hexanchorus virilis FZ623	Hexanchorus virilis FZ960	Hexanchorus virilis FZ1241	Hexanchorus virilis FZ1250	Potamophilops bostrychophallus FZ383	Pseudodisersus goudotii FZ855	Disersus inca FZ788
Hexanchorus cordillierae FZ602
Hexanchorus cordillierae FZ956	0.00160385
Hexanchorus cordillierae FZ966	0	0.00160385
Hexanchorus cordillierae FZ987	0	0.00160385	0
Hexanchorus cordillierae FZ972	0	0.00160385	0	0
Hexanchorus cordillierae FZ1242	0	0.00160385	0	0	0
Hexanchorus cordillierae FZ1243	0	0.00160385	0	0	0	0
Hexanchorus cordillierae FZ1244	0	0.00160385	0	0	0	0	0
Hexanchorus cordillierae FZ1245	0	0.00160385	0	0	0	0	0	0
Hexanchorus cordillierae FZ1248	0.00160514	0.00321414	0.00160514	0.00160514	0.00160514	0.00160514	0.00160514	0.00160514	0.00160514
Hexanchorus onorei onorei FZ621	0.0114566	0.0130977	0.0114566	0.0114566	0.0114566	0.0114566	0.0114566	0.0114566	0.0114566	0.0131363
Hexanchorus onorei onorei FZ971	0.0114566	0.0130977	0.0114566	0.0114566	0.0114566	0.0114566	0.0114566	0.0114566	0.0114566	0.0131363	0
Hexanchorus onorei onorei FZ1246	0.0114566	0.0130977	0.0114566	0.0114566	0.0114566	0.0114566	0.0114566	0.0114566	0.0114566	0.0131363	0	0
Hexanchorus onorei onorei FZ969	0.00978793	0.0114235	0.00978793	0.00978793	0.00978793	0.00978793	0.00978793	0.00978793	0.00978793	0.0114566	0.00160514	0.00160514	0.00160514
Hexanchorus onorei sagittatus FZ773	0.0114566	0.0130977	0.0114566	0.0114566	0.0114566	0.0114566	0.0114566	0.0114566	0.0114566	0.0131363	0.00322061	0.00322061	0.00322061	0.00160514
Hexanchorus onorei sagittatus FZ970	0.0114566	0.0130977	0.0114566	0.0114566	0.0114566	0.0114566	0.0114566	0.0114566	0.0114566	0.0131363	0.00322061	0.00322061	0.00322061	0.00160514	0
Hexanchorus onorei sagittatus FZ1252	0.0114566	0.0130977	0.0114566	0.0114566	0.0114566	0.0114566	0.0114566	0.0114566	0.0114566	0.0131363	0.00322061	0.00322061	0.00322061	0.00160514	0	0
Hexanchorus shepardi FZ967	0.0215263	0.0232082	0.0215263	0.0215263	0.0215263	0.0215263	0.0215263	0.0215263	0.0215263	0.0232566	0.0232566	0.0232566	0.0232566	0.0215263	0.0232566	0.0232566	0.0232566
Hexanchorus shepardi FZ968	0.0215263	0.0232082	0.0215263	0.0215263	0.0215263	0.0215263	0.0215263	0.0215263	0.0215263	0.0232566	0.0232566	0.0232566	0.0232566	0.0215263	0.0232566	0.0232566	0.0232566	0
Hexanchorus shepardi FZ1247	0.0215263	0.0232082	0.0215263	0.0215263	0.0215263	0.0215263	0.0215263	0.0215263	0.0215263	0.0232566	0.0232566	0.0232566	0.0232566	0.0215263	0.0232566	0.0232566	0.0232566	0	0
Hexanchorus tarsalis FZ1249	0.10647	0.108489	0.10647	0.10647	0.10647	0.10647	0.10647	0.10647	0.10647	0.104228	0.104228	0.104228	0.104228	0.102003	0.104228	0.104228	0.104228	0.108979	0.108979	0.108979
Hexanchorus tarsalis FZ1253	0.10647	0.108489	0.10647	0.10647	0.10647	0.10647	0.10647	0.10647	0.10647	0.104228	0.104228	0.104228	0.104228	0.102003	0.104228	0.104228	0.104228	0.108979	0.108979	0.108979	0
Hexanchorus virilis FZ623	0.123144	0.125246	0.123144	0.123144	0.123144	0.123144	0.123144	0.123144	0.123144	0.120823	0.116236	0.116236	0.116236	0.113968	0.116236	0.116236	0.116236	0.111912	0.111912	0.111912	0.121292	0.121292
Hexanchorus virilis FZ960	0.125482	0.127593	0.125482	0.125482	0.125482	0.125482	0.125482	0.125482	0.125482	0.123144	0.118521	0.118521	0.118521	0.116236	0.118521	0.118521	0.118521	0.114171	0.114171	0.114171	0.12363	0.12363	0.00160514
Hexanchorus virilis FZ1241	0.123144	0.125246	0.123144	0.123144	0.123144	0.123144	0.123144	0.123144	0.123144	0.120823	0.116236	0.116236	0.116236	0.113968	0.116236	0.116236	0.116236	0.111912	0.111912	0.111912	0.121292	0.121292	0	0.00160514
Hexanchorus virilis FZ1250	0.123144	0.125246	0.123144	0.123144	0.123144	0.123144	0.123144	0.123144	0.123144	0.120823	0.116236	0.116236	0.116236	0.113968	0.116236	0.116236	0.116236	0.111912	0.111912	0.111912	0.121292	0.121292	0	0.00160514	0
Potamophilops bostrychophallus FZ383	0.194064	0.196554	0.194064	0.194064	0.194064	0.194064	0.194064	0.194064	0.194064	0.196721	0.191429	0.191429	0.191429	0.191429	0.194064	0.194064	0.194064	0.188681	0.188681	0.188681	0.184245	0.184245	0.20002	0.202755	0.20002	0.20002
Pseudodisersus goudotii FZ855	0.204625	0.207164	0.204625	0.204625	0.204625	0.204625	0.204625	0.204625	0.204625	0.201913	0.201913	0.201913	0.201913	0.201913	0.204625	0.204625	0.204625	0.202101	0.202101	0.202101	0.232455	0.232455	0.225164	0.228105	0.225164	0.225164	0.185297
Disersus inca FZ788	0.202523	0.20504	0.202523	0.202523	0.202523	0.202523	0.202523	0.202523	0.202523	0.199799	0.197097	0.197097	0.197097	0.197097	0.199799	0.199799	0.199799	0.202755	0.202755	0.202755	0.189494	0.189494	0.203263	0.206045	0.203263	0.203263	0.173668	0.176018

## Sheet: Caption
Table. Estimates of Evolutionary Divergence between Sequences
The number of base substitutions per site from between sequences are shown. Analyses were conducted using the Kimura 2-parameter model [1]. The rate variation among sites was modeled with a gamma distribution (shape parameter = 1). The analysis involved 29 nucleotide sequences. Codon positions included were 1st+2nd+3rd+Noncoding. All positions containing gaps and missing data were eliminated. The…
1. Kimura M. (1980). A simple method for estimating evolutionary rate of base substitutions through comparative studies of nucleotide sequences. Journal of Molecular Evolution 16:111-120.
2. Kumar S., Stecher G., and Tamura K. (2016). MEGA7: Molecular Evolutionary Genetics Analysis version 7.0 for bigger datasets.Molecular Biology and Evolution 33:1870-1874.
Disclaimer: Although utmost care has been taken to ensure the correctness of the caption, the caption text is provided "as is" without any warranty of any kind. Authors advise the user to carefully check the caption prior to its use for any purpose and report any errors or problems to the authors immediately (www.megasoftware.net). In no event shall the authors and their employers be liable for a…
